# Supplementary figures and images for: Manipulation of gut microbiota blunts the ventilatory response to hypercapnia in adult rats
Source: PubMed Central journal article supplement — eBioMedicine. 2019 Mar 18;44:618–38. doi: 10.1016/j.ebiom.2019.03.029 (PMC6606895; doi:10.1016/j.ebiom.2019.03.029), 2019-03-18

- VEH
- ABX
- △ VEH-FMT
- ABX-FMT

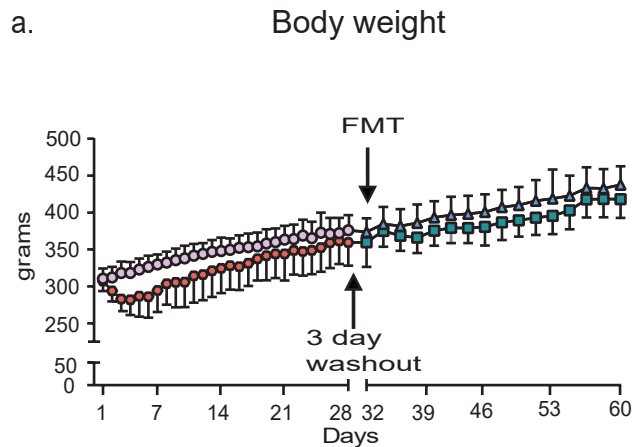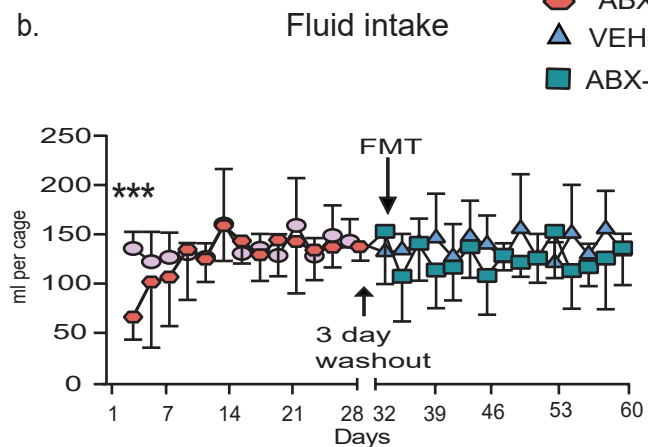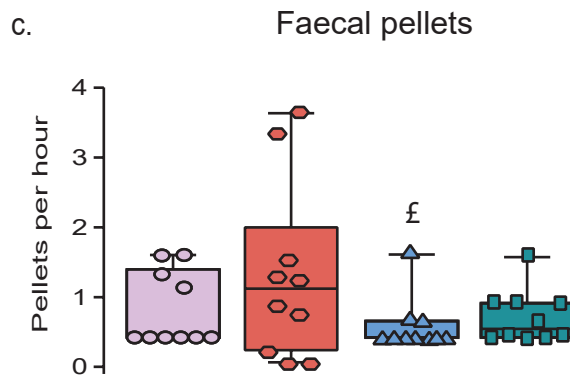

Supplement: mmc1.pdf [file mmc1.pdf]

# Hypoxia

# Hypercapnia

- VEH
- ABX
- ▲ VEH-FMT
- ABX-FMT

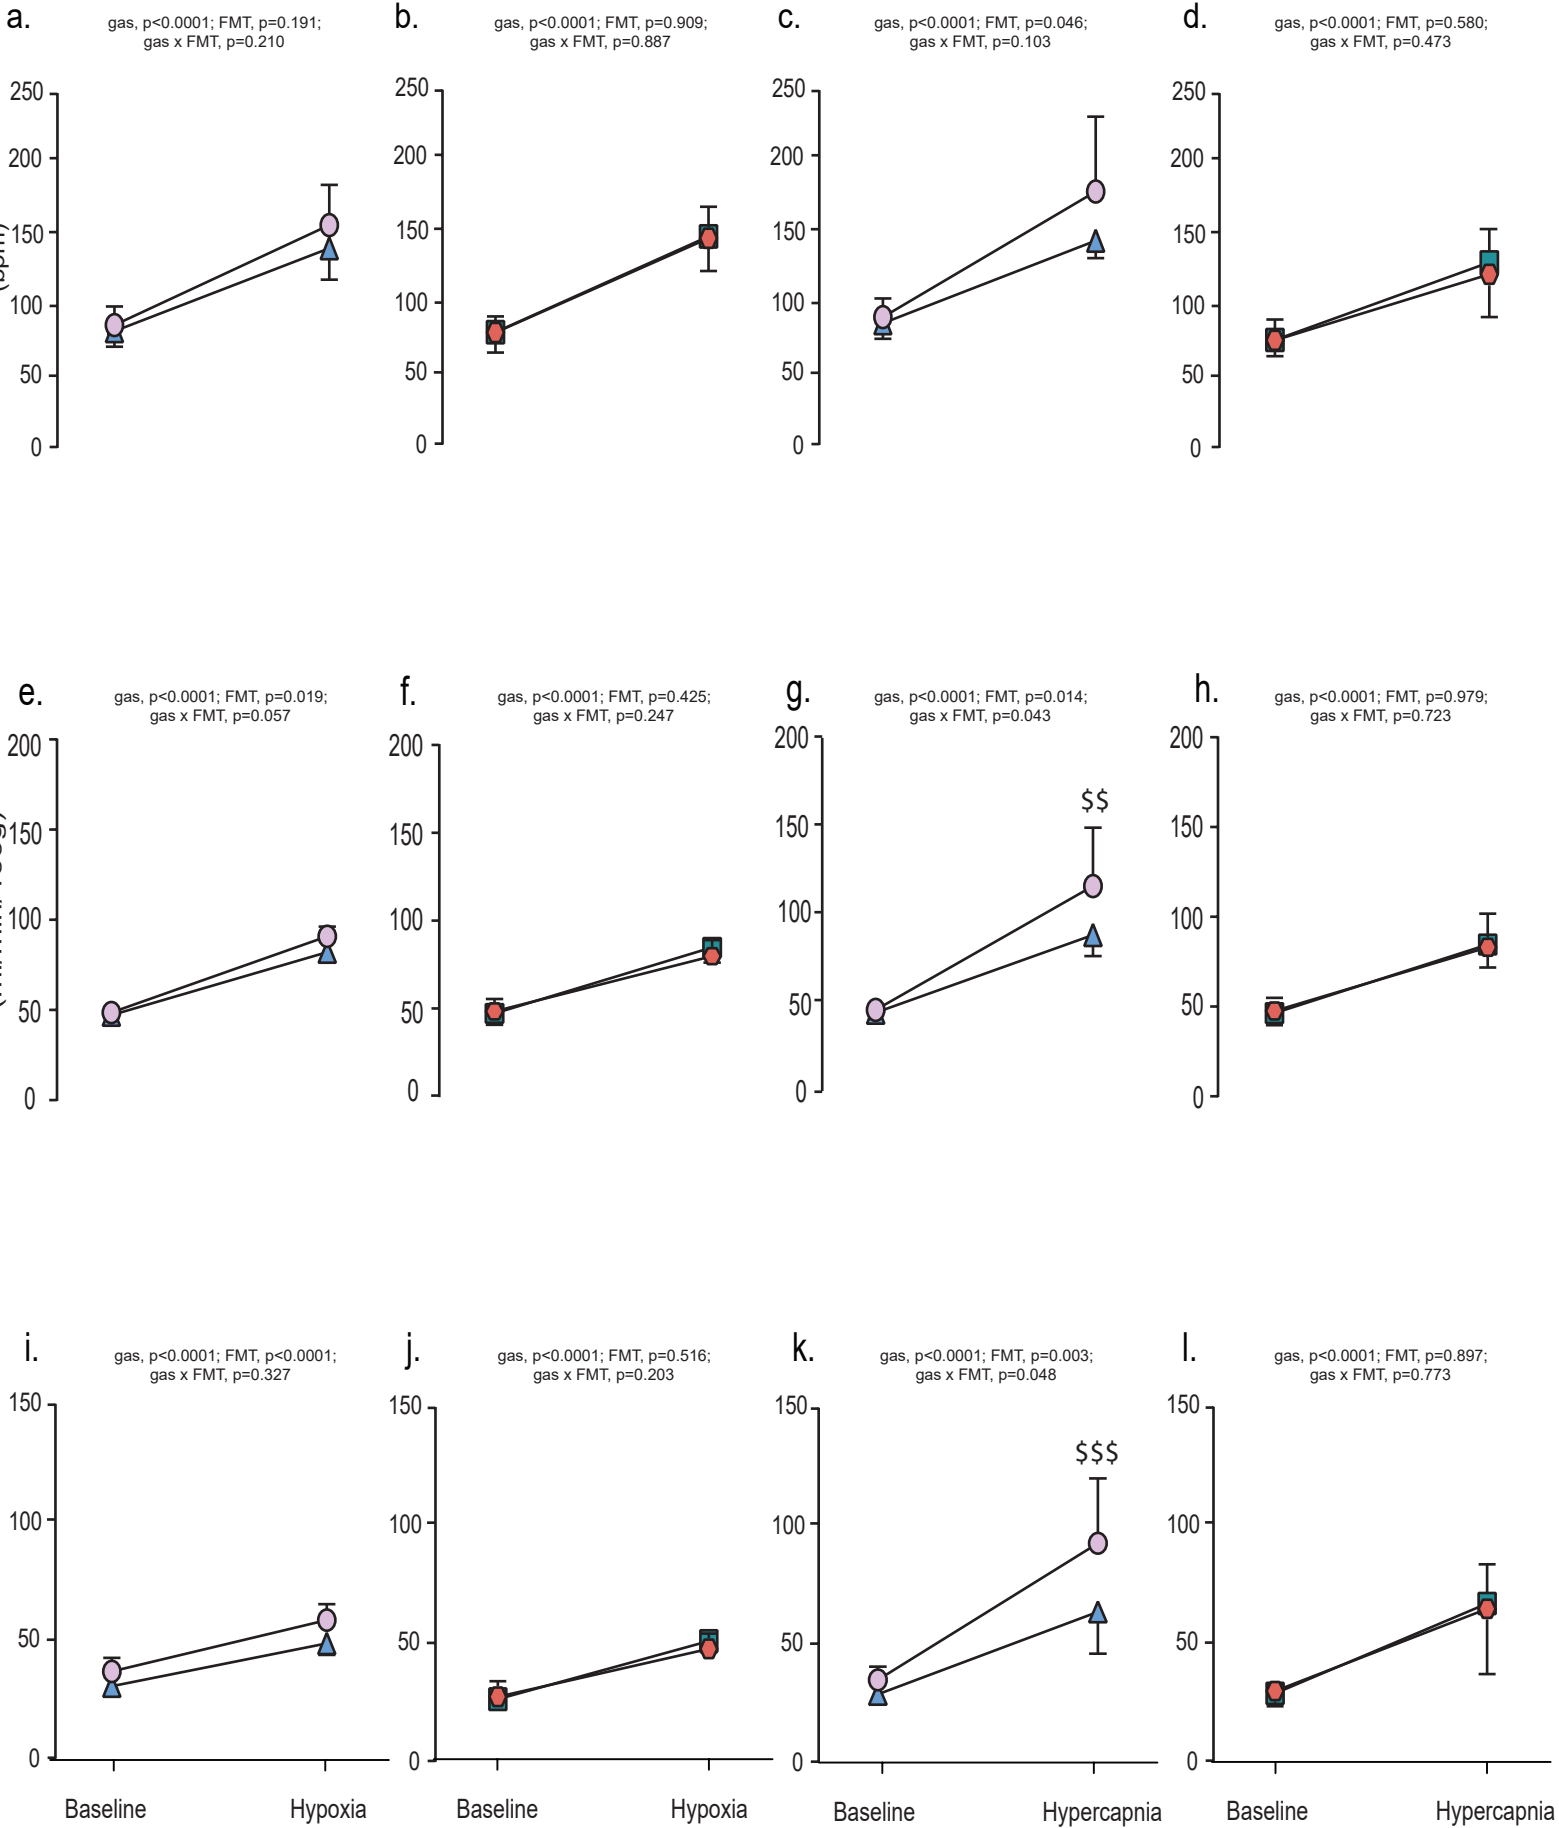

Supplement: mmc2.pdf [file mmc2.pdf]

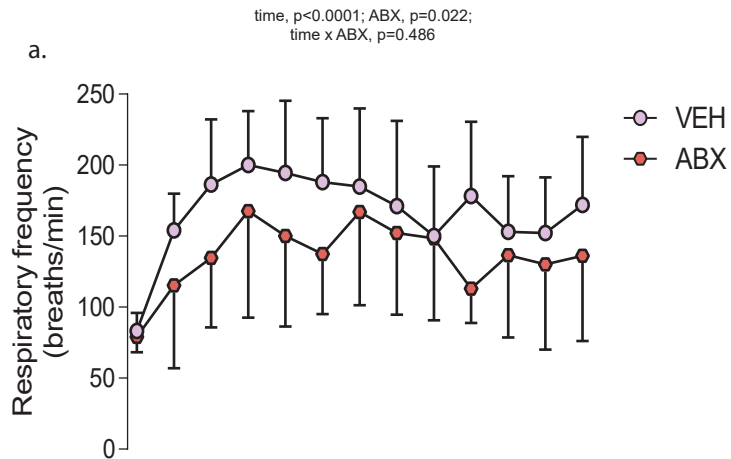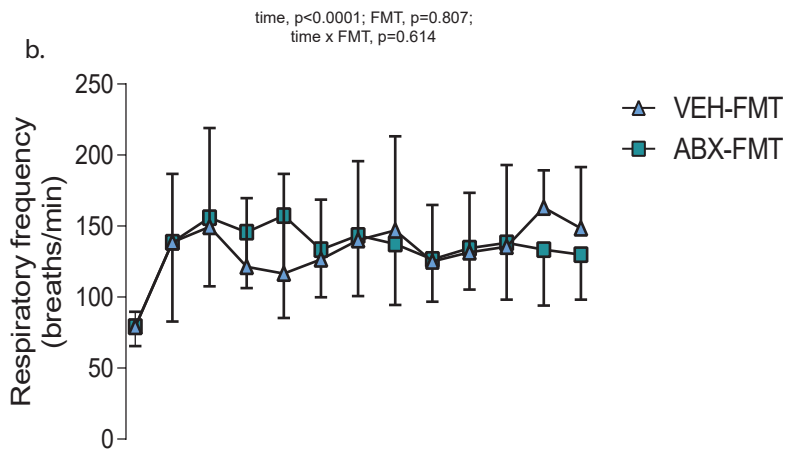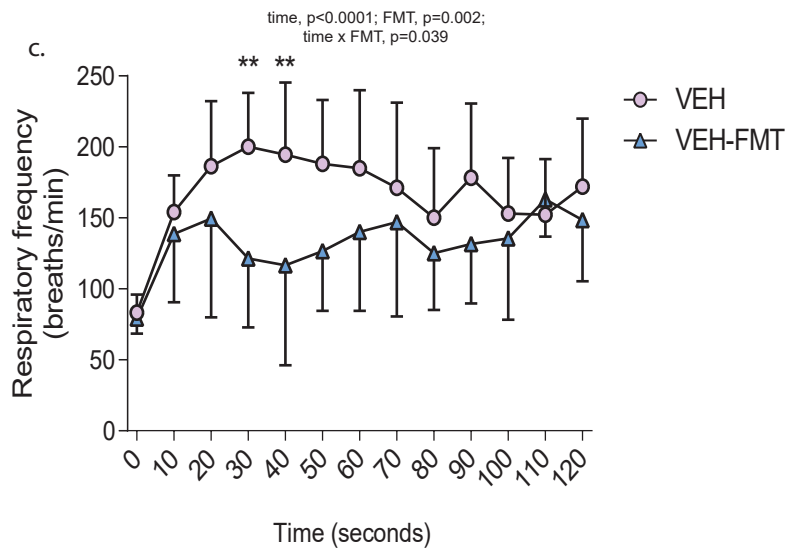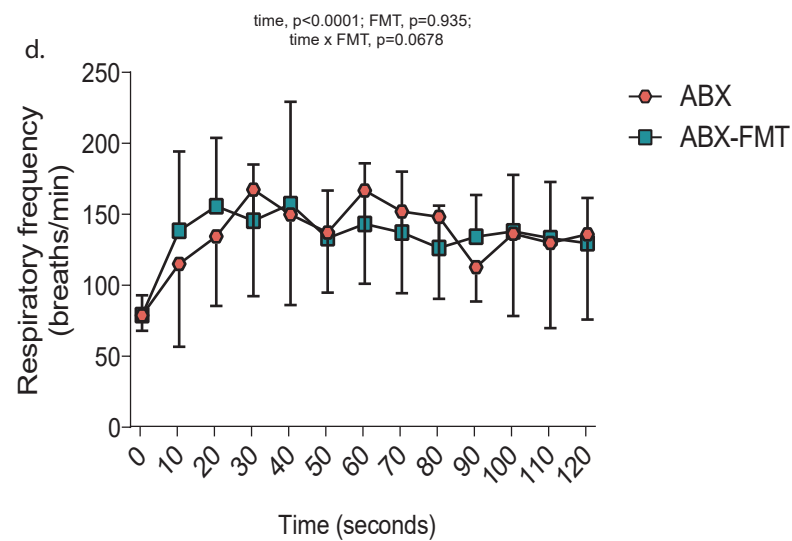

Supplement: mmc3.pdf [file mmc3.pdf]

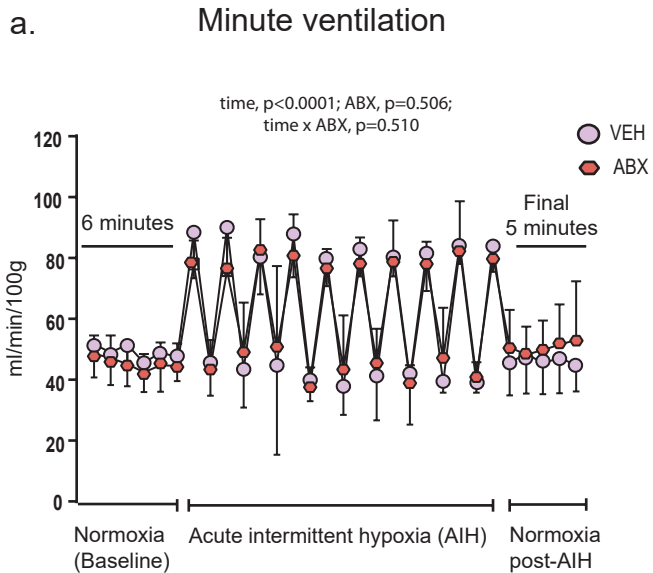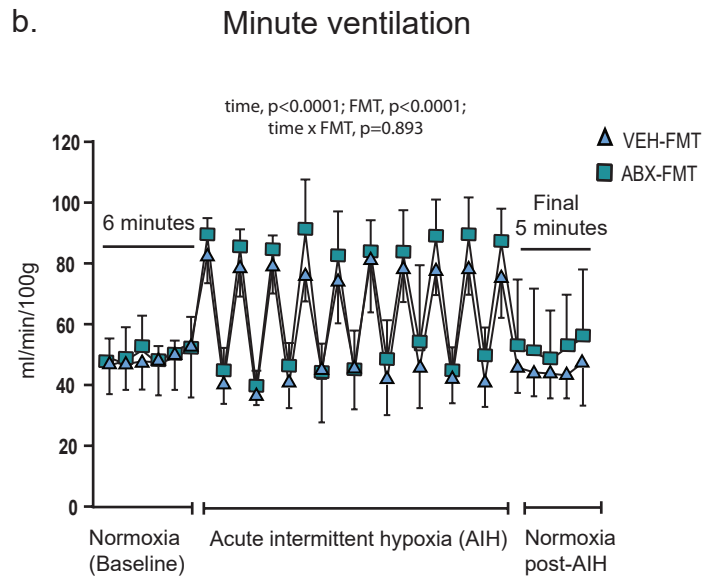

Supplement: mmc4.pdf [file mmc4.pdf]

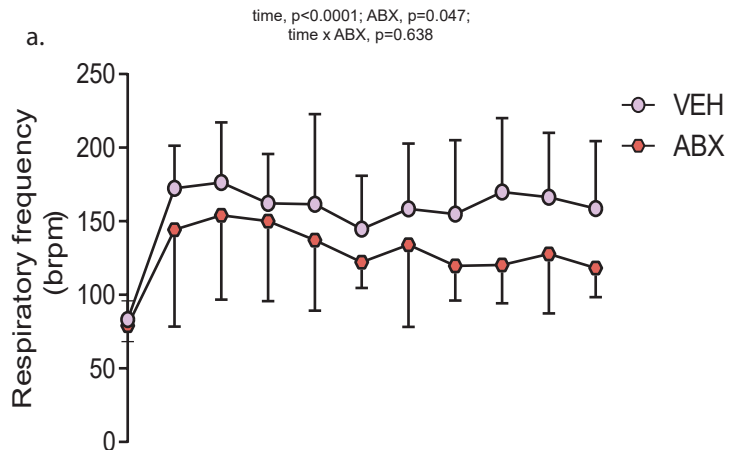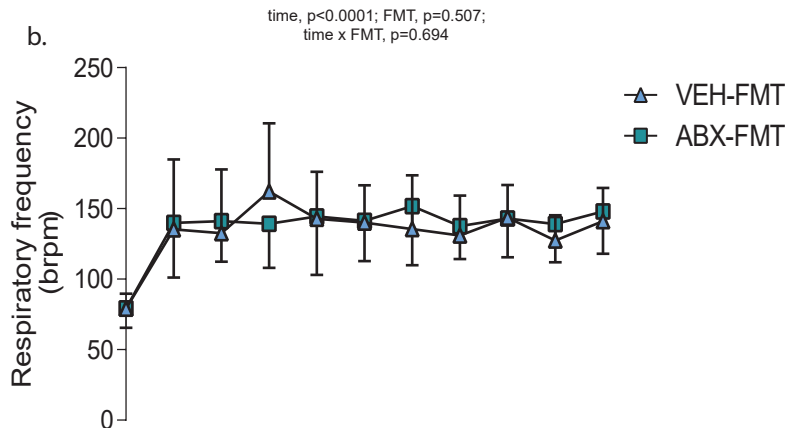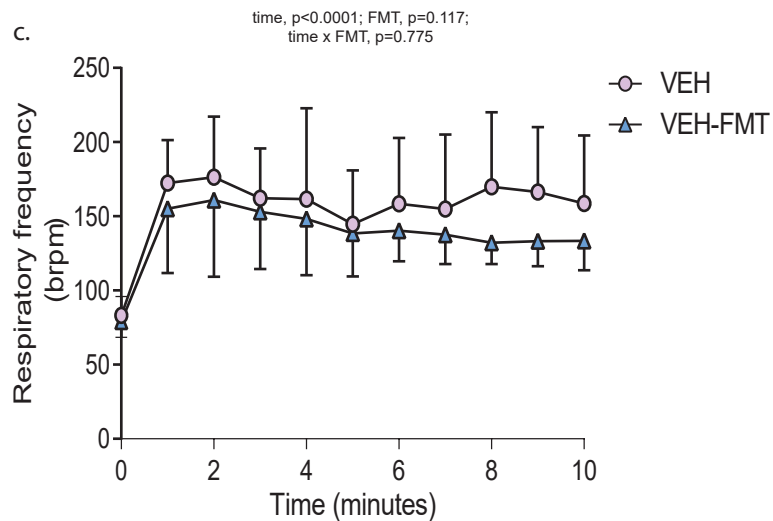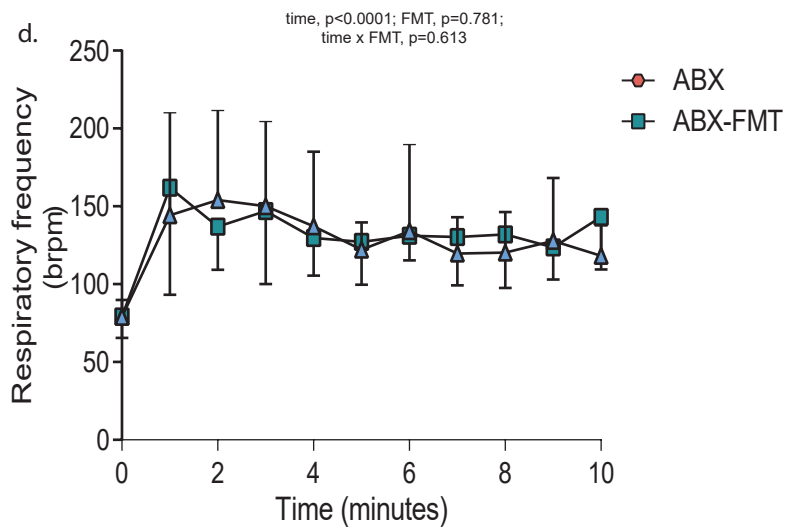

Supplement: mmc5.pdf [file mmc5.pdf]

## Distal ileum

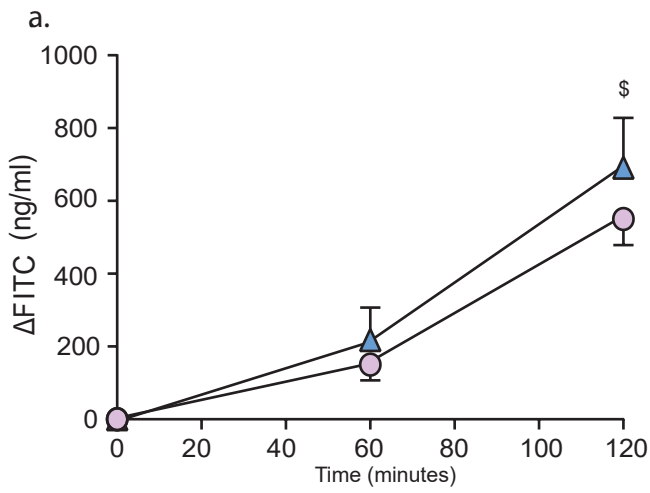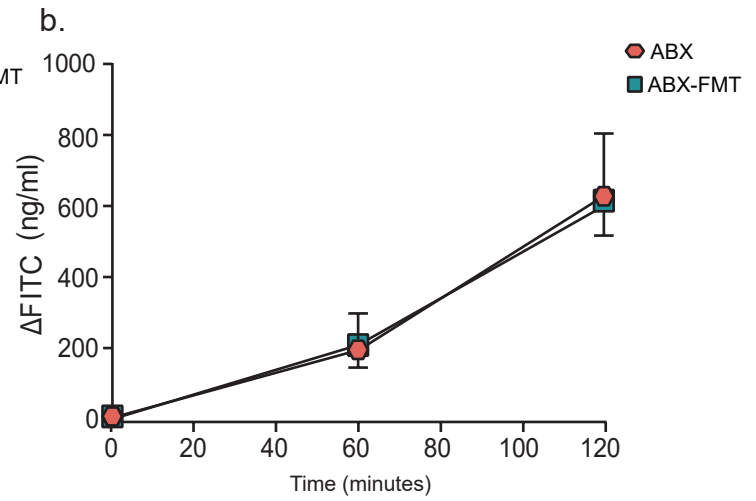

## Proximal colon

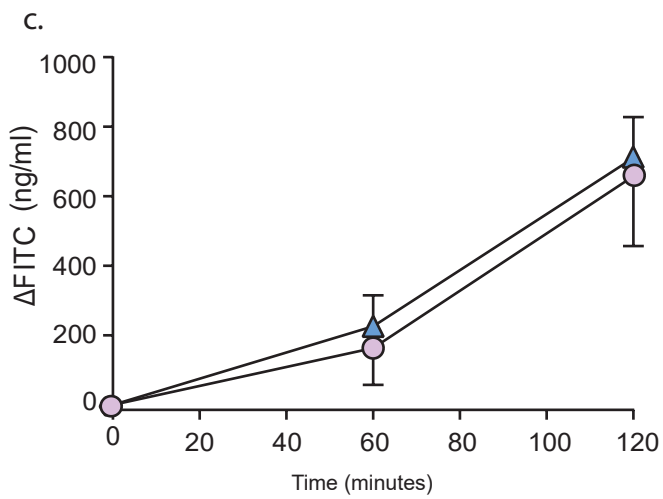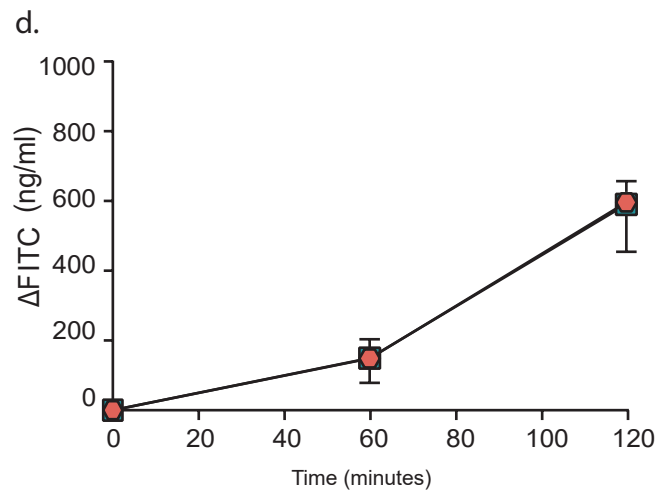

Supplement: mmc6.pdf [file mmc6.pdf]

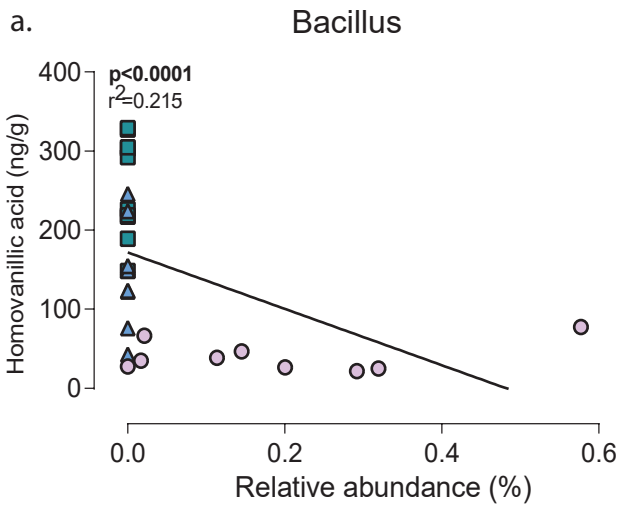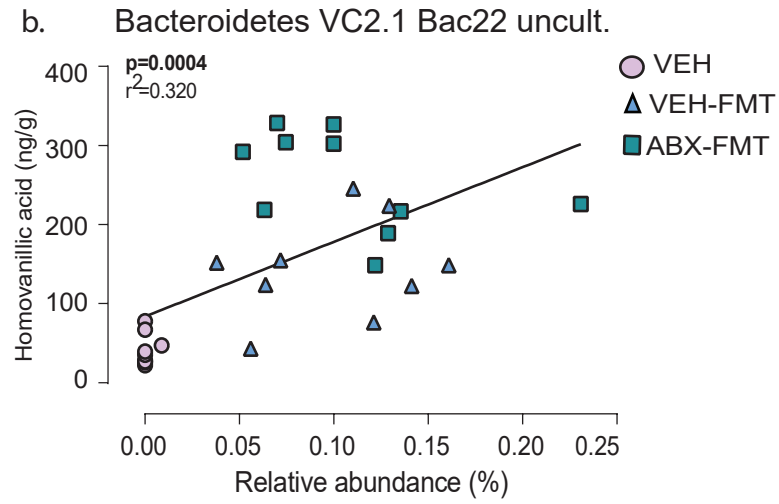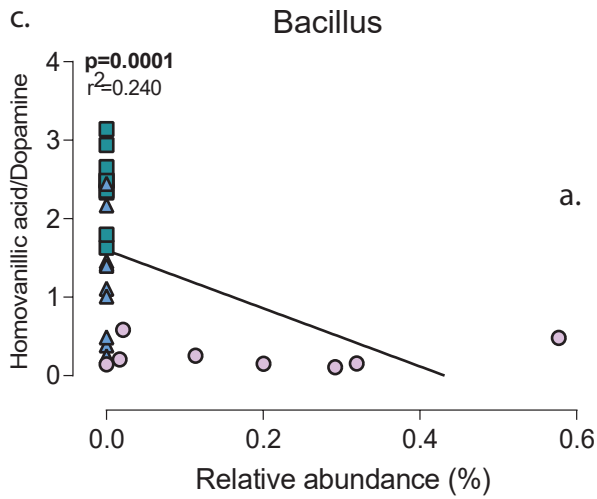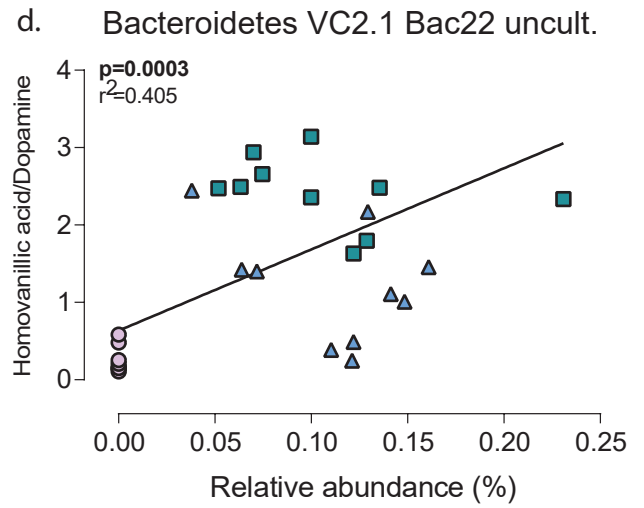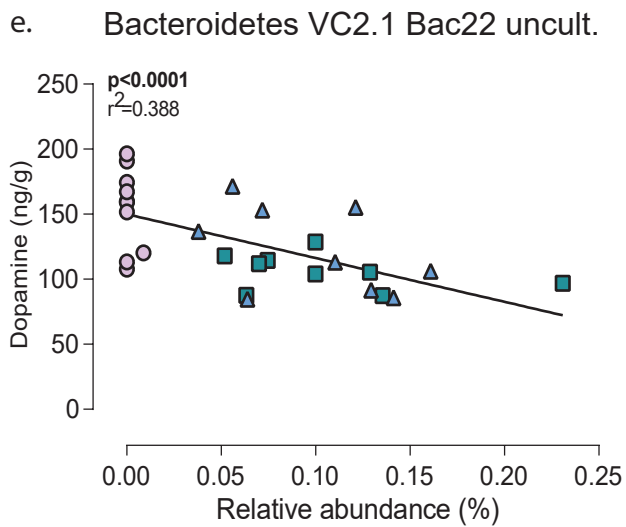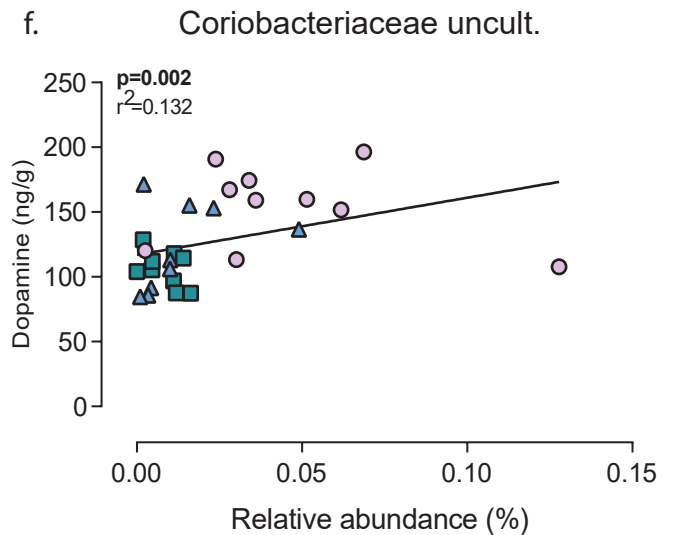

Supplement: mmc7.pdf [file mmc7.pdf]
